# Supplementary material
Source: PubMed Central journal article supplement (PMC2702157)
Supplement: NIHMS112295-supplement-1.pdf [file NIHMS112295-supplement-1.pdf]

**Supplementary Information**

**Supplementary Figures**

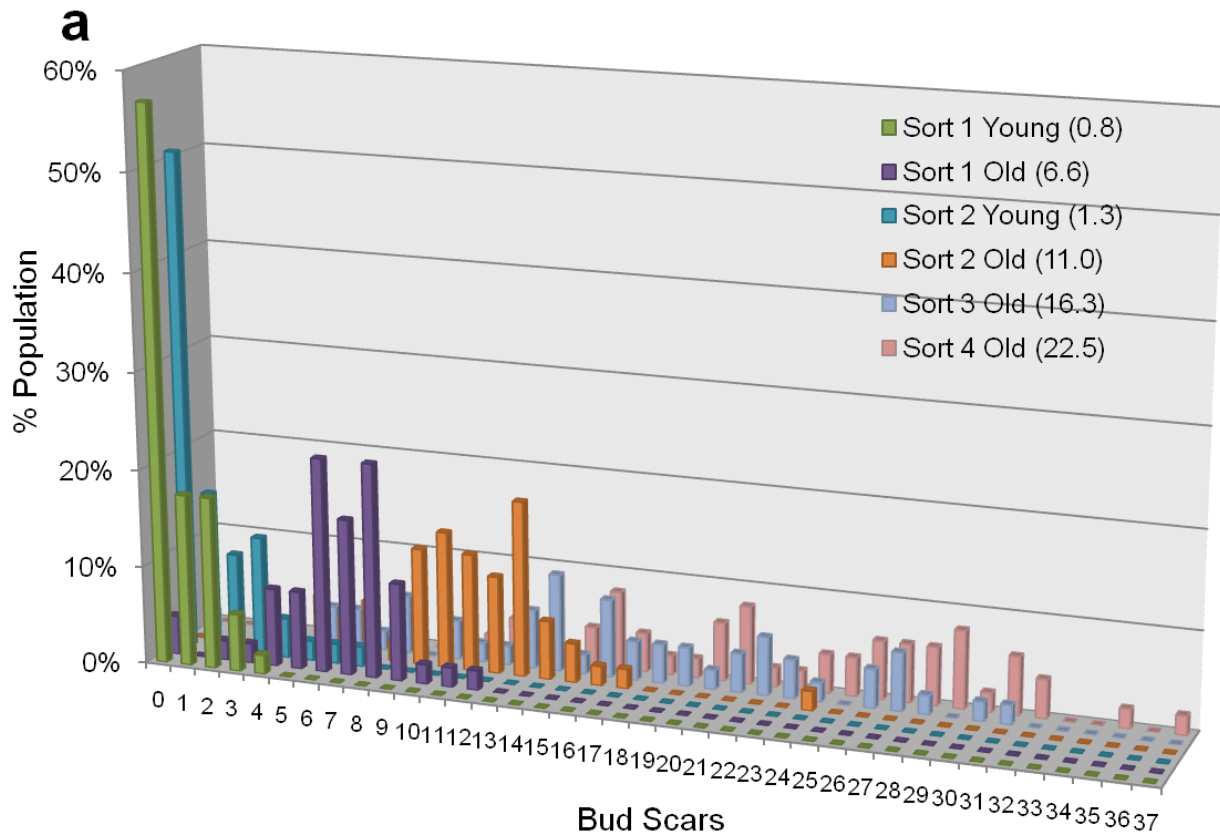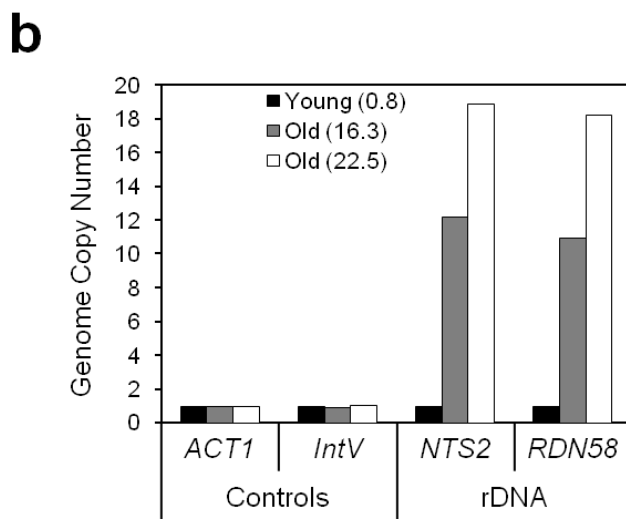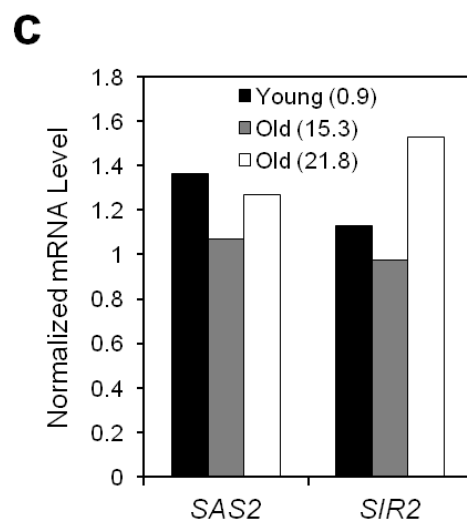

**Supplementary Figure 1. Isolated old cells show increasing bud scars and rDNA copy numbers, but no change in *SIR2* expression levels.**

(a) An example of age distribution of isolated young and old cells from four rounds of progressive sorting. Bud scars were stained with Calcofluor and visualized by fluorescence microscopy. At least 50 cells from each fraction were counted for total number of bud scars. (b) Total genomic DNA was purified from whole cell extracts and copy number was quantified by real-time PCR with primers specific to *ACT1* gene, an intergenic region on Chromosome V (*IntV*), non-transcribed region *NTS2* and *RDN58* gene on rDNA repeat. All signals were normalized to that of *ACT1* gene and then to young cell levels. (c) Quantitative real-time PCR analysis of mRNA expression levels for *SAS2* and *SIR2* in young and old cells of strain BY4741. Real-time PCR primers are listed in Supplementary Table 4. Signals were normalized to *ACT1* levels. Average bud scar counts are indicated in parenthesis.

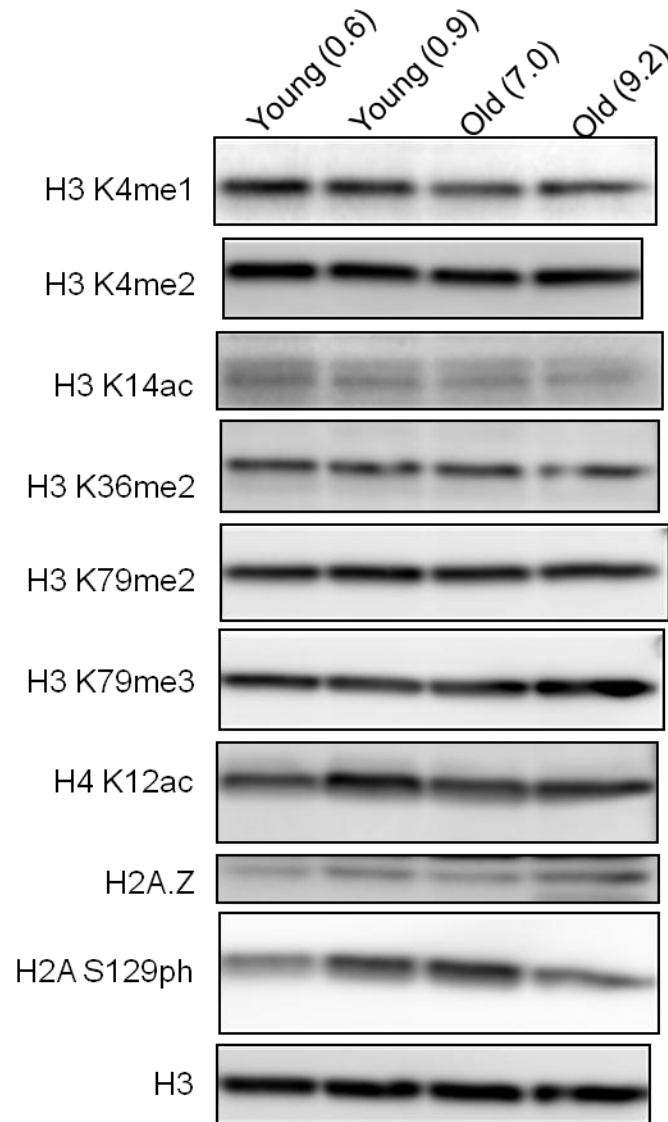

**Supplementary Figure 2. Examples of other histone modifications remaining unchanged in old cells.**

Samples as in Fig. 1a were analyzed with other antibodies with details listed in Supplementary Table 3. Average bud scar counts are indicated in parenthesis.

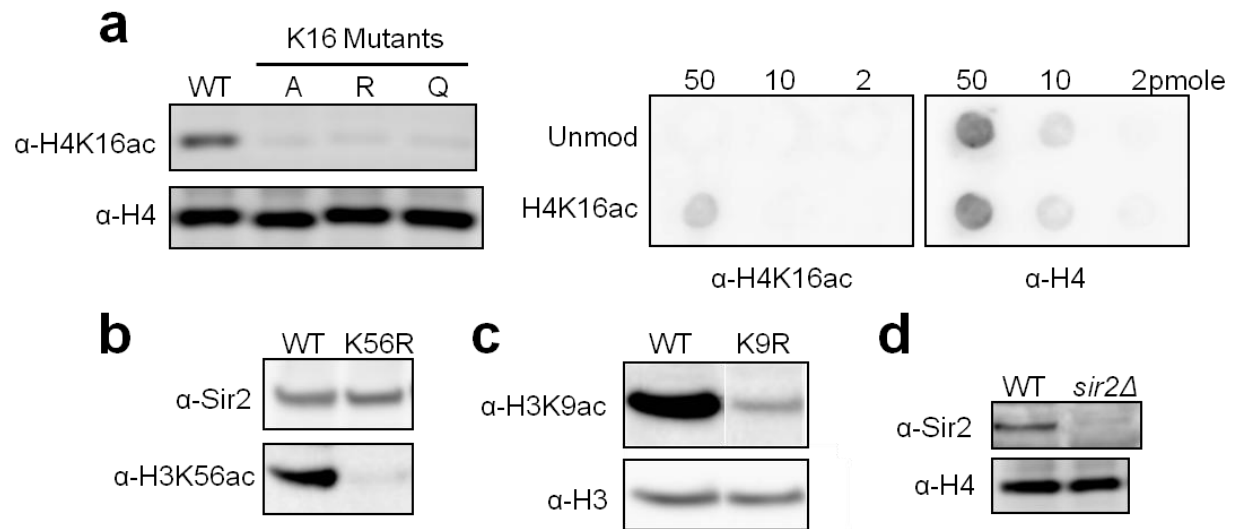

**Supplementary Figure 3. Specificity of key antibodies used in this study.**

(a) Left: Whole cell extracts from strains carrying WT histone H4, H4K16A, H4K16R, or H4K16Q plasmids were analyzed by western blot and probed with antibodies against H4K16ac and H4. Right: H4 N-terminal peptide containing the first 30 amino acids (unmod) and corresponding K16 acetylated (H4K16ac) peptides were dot-blotted onto a PVDF membrane with the indicated amount and probed with H4K16ac and H4 antibodies. (b) Whole cell extracts from strains carrying WT H3 or H3K56R plasmids were analyzed by western blot and probed with antibodies against H3K56ac and Sir2. (c) Whole cell extracts from strains carrying WT H3 or H3K9R plasmids were analyzed by western blot and probed with antibodies against H3K9ac and histone H3. (d) Whole cell extracts from WT (BY4741) or *sir2* $\Delta$  strains were analyzed by western blot and probed with antibodies against Sir2 and H4.

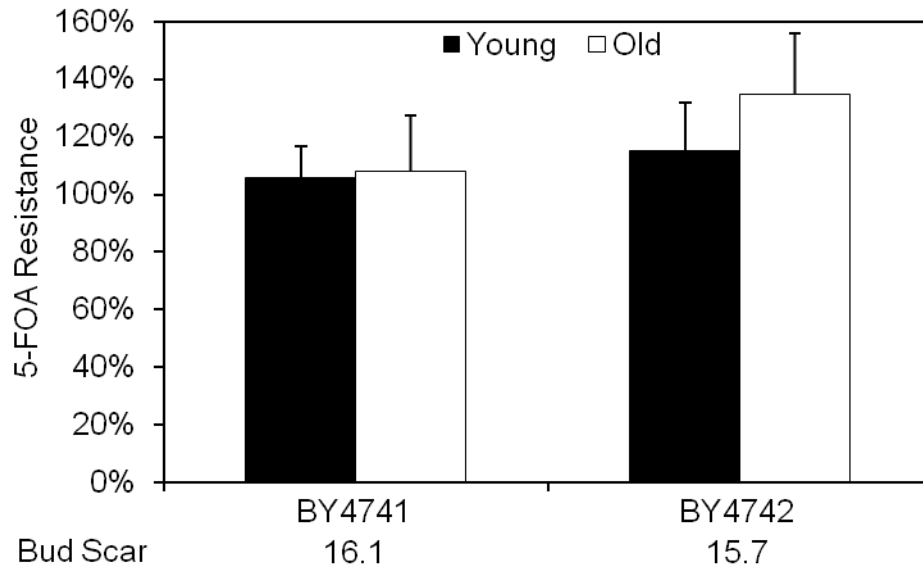

**Supplementary Figure 4. *ura3*Δ old cells are not sensitive to 5-FOA.**

Identical silencing assay as in Fig. 2b for young and old cells of strains containing *ura3*Δ. The extent of silencing is expressed as the fraction of cells resistant to 5-FOA (n=3). Average bud scar counts are listed for the old cell samples. Error bars show standard deviations.

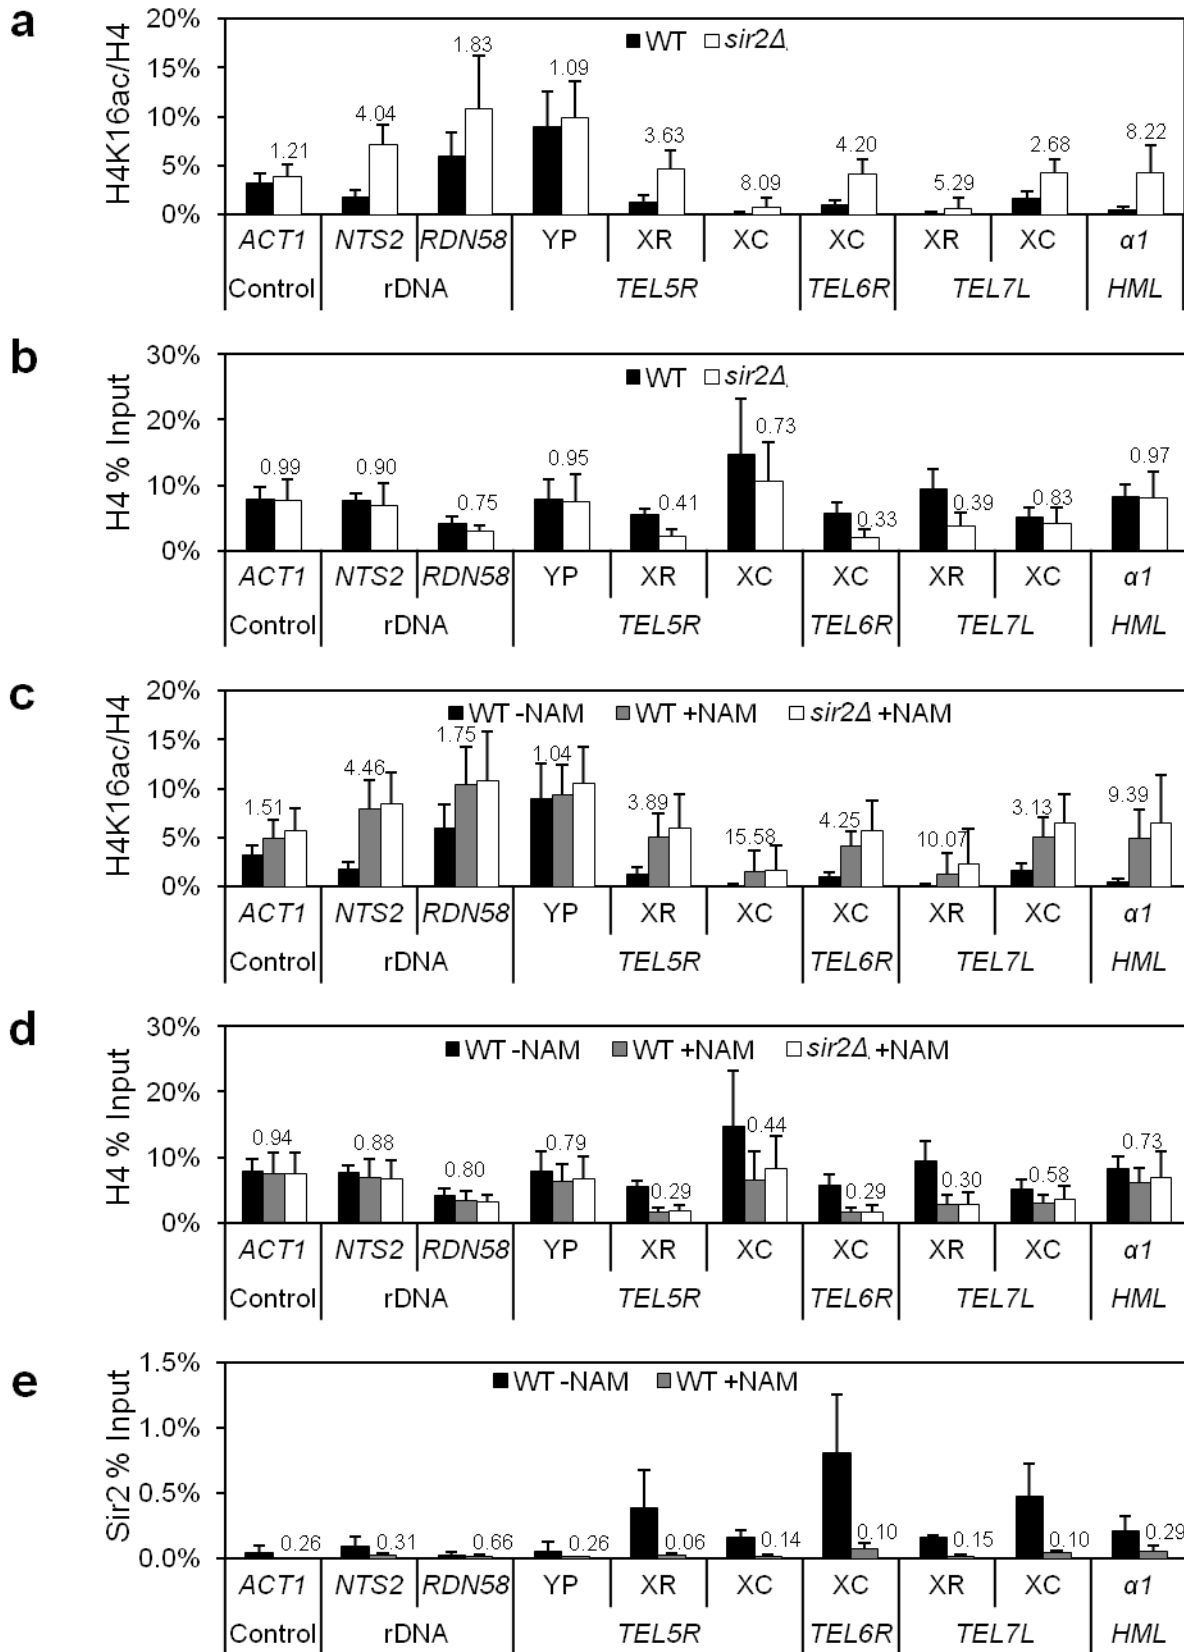

**Supplementary Figure 5. Localized changes of H4K16 acetylation and histone levels when Sir2 is lost or inhibited.**

Chromatin Immunoprecipitation was performed for wild-type (BY4741) and *sir2Δ* cells (n=3) with antibodies against (a) H4K16ac and (b) histone H4. Fold changes for *sir2Δ* compared to wild-type are indicated above the bars. The same analysis was carried out for wild-type (BY4741) cells with (WT+NAM) or without (WT-NAM) treatment of 5 mM nicotinamide (NAM) and *sir2Δ* cells with 5 mM nicotinamide (*sir2Δ*+NAM) (n=3) with antibodies against (c) H4K16ac and (d) histone H4. Fold changes for WT+NAM compared to WT-NAM are indicated above the bars. (e) Chromatin Immunoprecipitation was performed for wild-type (BY4741) cells with (WT+NAM) and without (WT-NAM) treatment of 5 mM nicotinamide (n=3) with antibodies against Sir2. The primer sets are shown in Fig. 1b. All error bars show standard deviations.

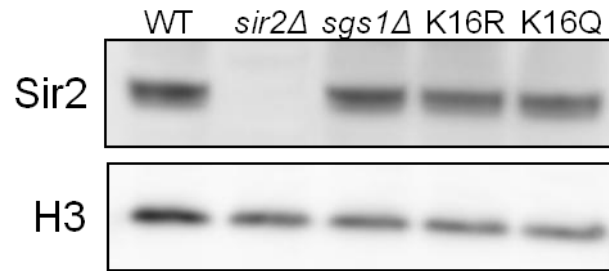

**Supplementary Figure 6. Mutations of H4K16 does not affect availability of Sir2.**

Western analysis with antibodies against Sir2 and H3 for cells bearing WT histone H4, H4K16R, or H4K16Q plasmids.



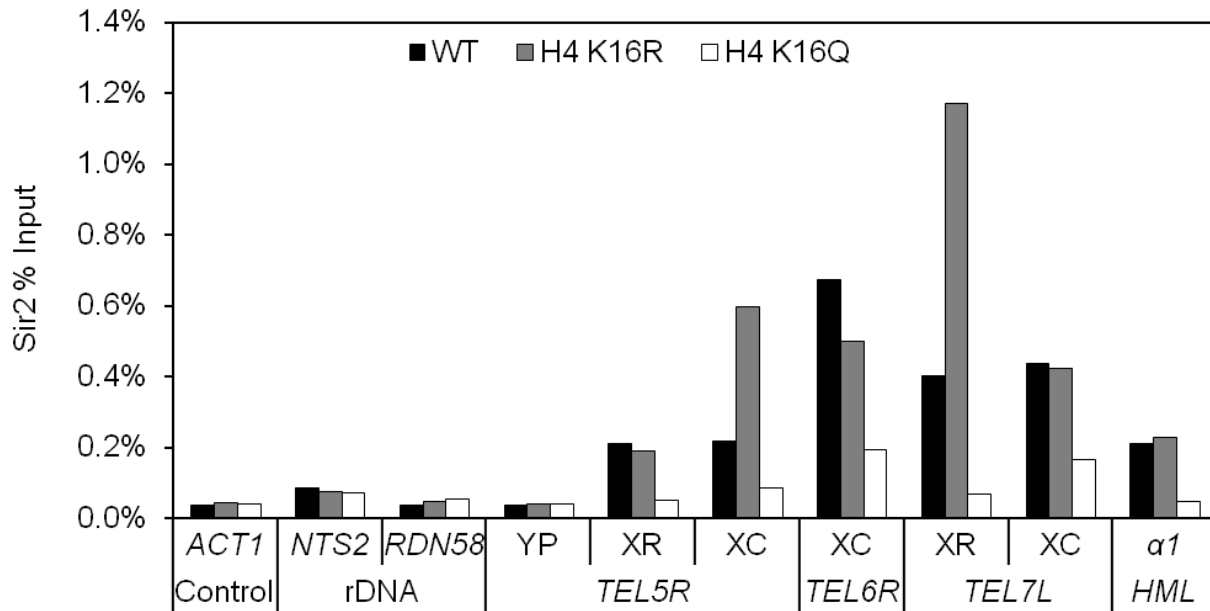

**Supplementary Figure 7. H4K16Q mutation displaces Sir2 from its binding sites.**

Chromatin Immunoprecipitation was performed for strains carrying WT histone H4, H4K16R, or H4K16Q plasmids with antibodies against Sir2 and analyzed by real-time PCR with primers shown in Fig. 1b.

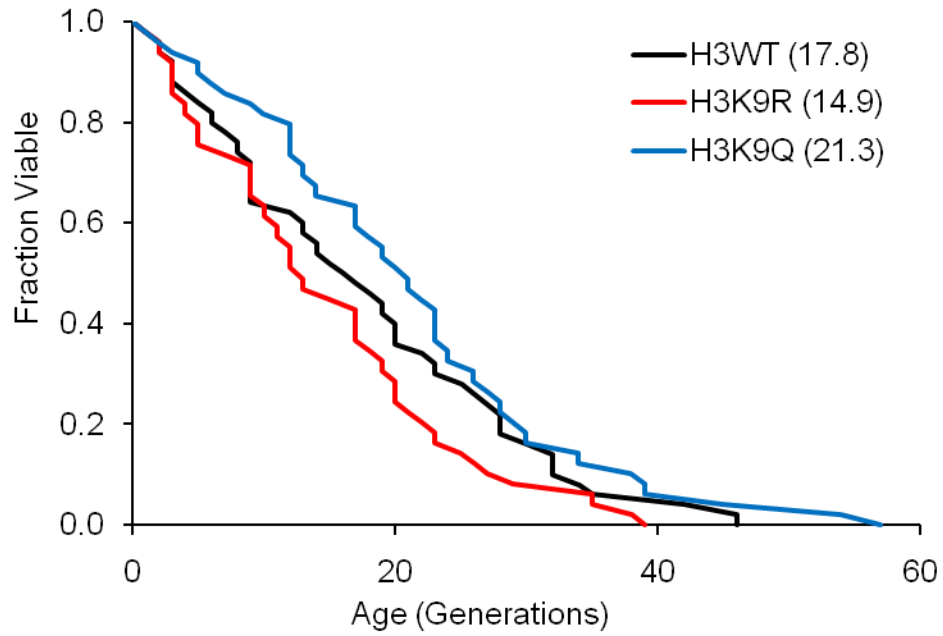

**Supplementary Figure 8. H3K9 mutations do not significantly affect the replicative lifespan.**

Replicative lifespan analysis for strains carrying WT histone H3, H3K9R, or H3K9Q plasmids with MLS in parenthesis.

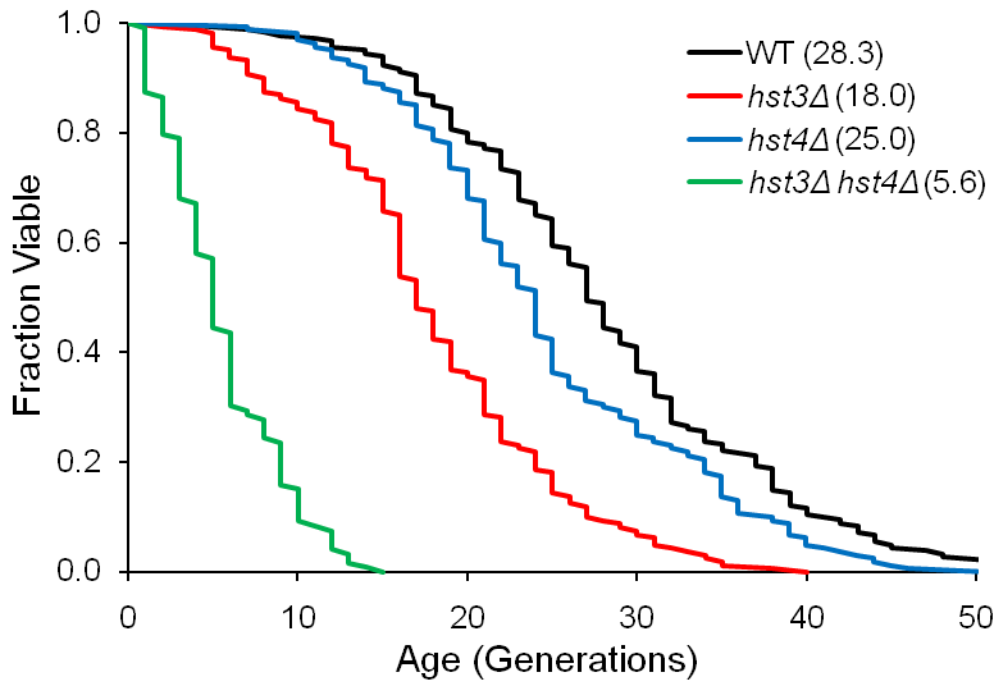

**Supplementary Figure 9. Replicative lifespan for *HST3* or *HST4* deletion strains.**

Replicative lifespan analysis for yeast strains WT (*MAT $\alpha$*  140 cells, *MATa* 40 cells), *hst3Δ* (*MAT $\alpha$*  120 cells, *MATa* 40 cells), *hst4Δ* (*MAT $\alpha$*  120 cells, *MATa* 40 cells), and *hst3Δ hst4Δ* (*MAT $\alpha$*  119 cells) with mean lifespan in parenthesis. The p-values for *hst3Δ*, *hst4Δ*, and *hst3Δ hst4Δ* compared to WT were  $1.8 \times 10^{-26}$ ,  $1.2 \times 10^{-5}$ ,  $1.0 \times 10^{-52}$ , respectively.

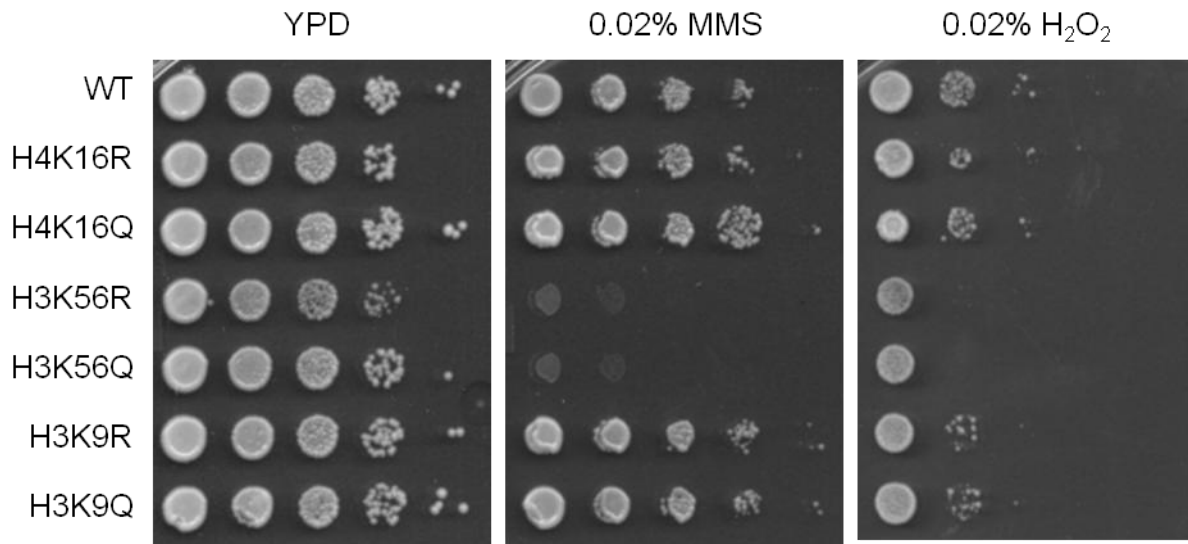

**Supplementary Figure 10. Both R and Q mutations to H3K56 result in sensitivity to DNA damaging agents.**

Strains bearing wild-type or mutant histone H3-H4 plasmids were 10-fold serial-diluted and plated on YPD, YPD containing 0.02% MMS, and YPD containing 0.02% H<sub>2</sub>O<sub>2</sub>.

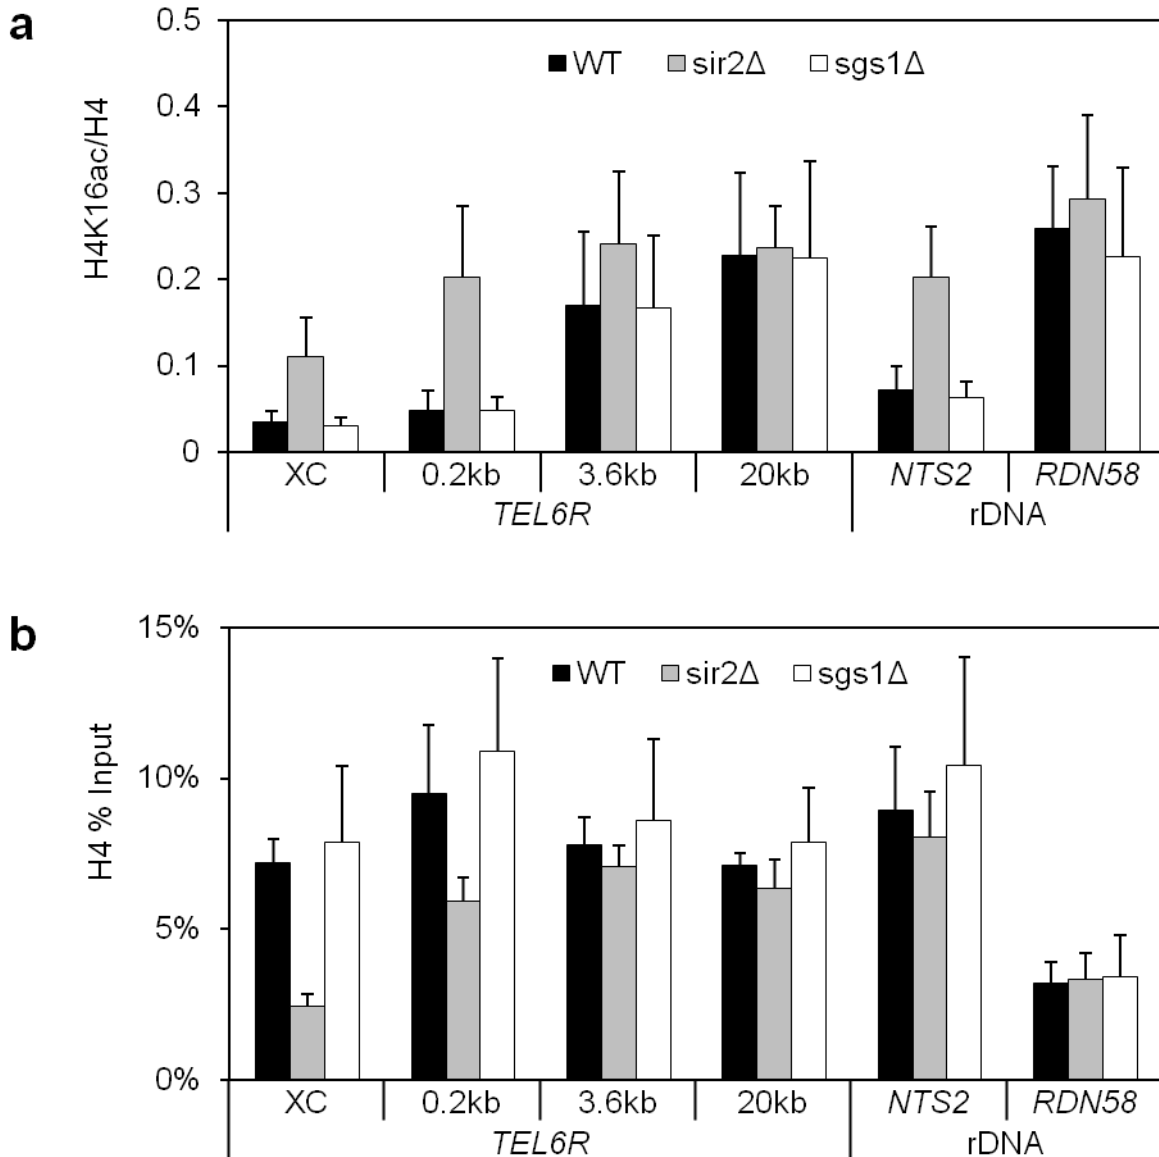

**Supplementary Figure 11. Deletion of SIR2, but not SGS1, causes changes to telomere chromatin.**

ChIP analysis for wild-type, *sir2Δ*, and *sgs1Δ* cells with antibodies against H4K16ac (a) and H4 (b). Error bars show standard deviations (n=3).

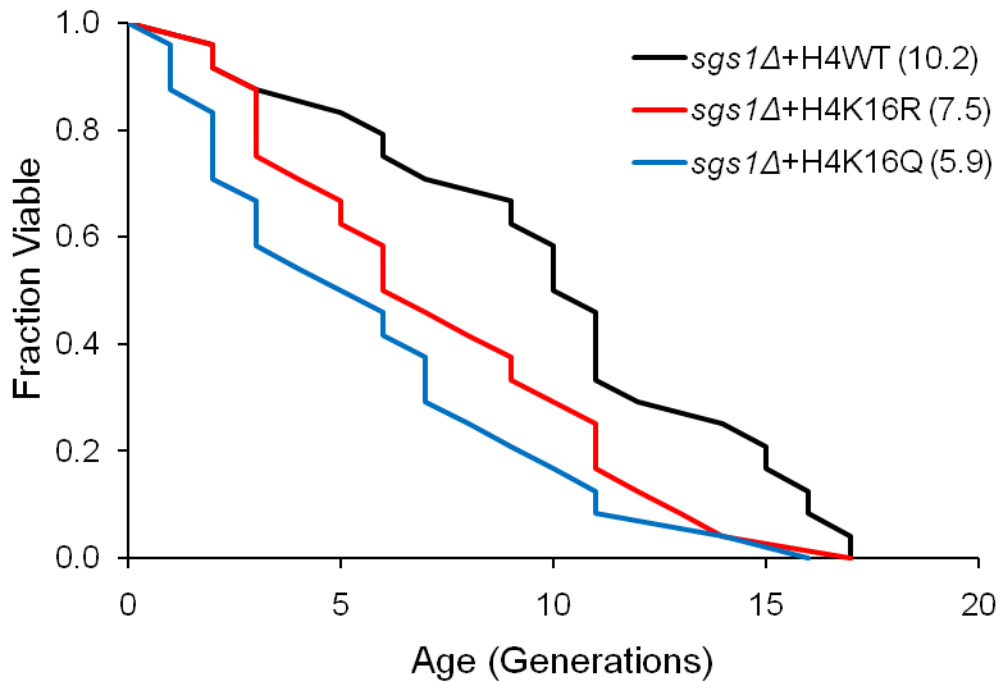

**Supplementary Figure 12. Replicative lifespan for H4K16 mutants in *sgs1Δ* background.**

Replicative lifespan analysis for yeast strains containing integrated WT histone H4, H4K16R, or H4K16Q in *sgs1Δ* backgrounds with mean lifespan in parenthesis (n=24, each). The p-values for *sgs1Δ*+H4K16R and *sgs1Δ*+H4K16Q compared to *sgs1Δ*+H4WT were  $7.6 \times 10^{-3}$  and  $1.7 \times 10^{-3}$ , respectively.

**Supplementary Tables****Supplementary Table 1. H4K16ac and histone occupancy change more dramatically at X elements of telomeres in old cells.**

|                    | TEL-X      | Other Sir2 | <i>ACT1</i> |
|--------------------|------------|------------|-------------|
| H4K16ac, Old/Young | 3.08±0.44  | 2.49±0.21  | 1.96        |
| H3, Young/Old      | 6.52±1.07  | 3.53±0.69  | 3.30        |
| H4, Young/Old      | 5.67±0.79  | 3.95±1.46  | 4.47        |
| Sir2, Young/Old    | 13.71±2.28 | 12.27±3.44 | 2.09        |

ChIP analysis with primers for XC and XR elements of telomeres *TEL5R*, *TEL6L*, *TEL6R*, *TEL7L*, *TEL9L*, *TEL9R*, *TEL10R*, *TEL11L*, and *TEL15R*, as well as other Sir2 sites (*NTS2*, *RDN58*, and *HML $\alpha$ 1*) and *ACT1* control, using another set of age-sorted cells with average bud scar counts of 0.5 for young and 18.6 for old cells. Average fold changes between young and old cells are shown with margins estimated with 90% confidence intervals.

**Supplementary Table 2. List of strains used in this study.**

| <b>Strain Name</b>  | <b>Genotype</b>                                                                                                            | <b>Source</b> | <b>Note</b>           |
|---------------------|----------------------------------------------------------------------------------------------------------------------------|---------------|-----------------------|
| <b>Figure 1a</b>    |                                                                                                                            |               |                       |
| W1588-4C            | <i>MATa RAD5 leu2-3,112 trp1-1 can1-100 ura3-1 ade2-1 his3-11,15</i>                                                       | R. Rothstein  | W303 with <i>RAD5</i> |
| <b>Figure 1c</b>    |                                                                                                                            |               |                       |
| BY4741              | <i>MATa his3Δ1 leu2Δ0 met15Δ0 ura3Δ0</i>                                                                                   | Invitrogen    |                       |
| <b>Figure 2b</b>    |                                                                                                                            |               |                       |
| FEP100-10           | <i>MATa leu2Δ1 ura3-52 can1-1 ade2Δ, URA3_TELXIL position 1</i>                                                            | Ref. 26       |                       |
| FEP180              | <i>MATa ura3Δ851 leu2Δ1 his3Δ200 lys2Δ202 URA3_TELXIL position 2</i>                                                       | Ref. 26       |                       |
| FEP184              | <i>MATa ura3Δ851 leu2Δ1 his3Δ200 lys2Δ202 URA3_TELXIL position 3</i>                                                       | Ref. 26       |                       |
| FEP193              | <i>MATa ura3Δ851 leu2Δ1 his3Δ200 lys2Δ202 URA3_TELXIL position 4</i>                                                       | Ref. 26       |                       |
| FEP210b             | <i>MATa ura3Δ851 leu2Δ1 his3Δ200 lys2Δ202 URA3_TELXIL position 5</i>                                                       | Ref. 26       |                       |
| <b>Figure 3a</b>    |                                                                                                                            |               |                       |
| BY4741              | See Figure 1c                                                                                                              |               |                       |
| BY4742              | <i>MATa his3Δ1 leu2Δ0 lys2Δ0 ura3Δ0</i>                                                                                    | Invitrogen    |                       |
| YKO6568             | BY4741 <i>sas2Δ::kanMX4</i>                                                                                                | Invitrogen    |                       |
| YKO16568            | BY4742 <i>sas2Δ::kanMX4</i>                                                                                                | Invitrogen    |                       |
| <b>Figure 3b</b>    |                                                                                                                            |               |                       |
| BY4741              | See Figure 1c                                                                                                              |               |                       |
| YWD250              | BY4741 <i>sas2Δ::kanMX4</i>                                                                                                | This work     |                       |
| YWD400              | BY4741 <i>LEU2::SIR2</i>                                                                                                   | This work     |                       |
| YWD450              | BY4741 <i>LEU2::SIR2 sas2Δ::kanMX4</i>                                                                                     | This work     |                       |
| <b>Figure 3cdef</b> |                                                                                                                            |               |                       |
| BY4741              | See Figure 1c                                                                                                              |               |                       |
| YWD250              | See Figure 3b                                                                                                              |               |                       |
| <b>Figure 4ab</b>   |                                                                                                                            |               |                       |
| YWD120              | <i>MATa his3-200 leu2Δ1 ura3-52 trp1Δ63 lys2-128 (hht1-hhf1)Δ::LEU2 (hht2-hhf2)Δ::HIS3 pRM204[CEN TRP1 HHT2-HHF2]</i>      | This work     | From FY1716           |
| YWD123              | <i>MATa his3-200 leu2Δ1 ura3-52 trp1Δ63 lys2-128 (hht1-hhf1)Δ::LEU2 (hht2-hhf2)Δ::HIS3 pWD23[HHT2-hhf2(K16R) TRP1 CEN]</i> | This work     | From FY1716           |
| YWD125              | <i>MATa his3-200 leu2Δ1 ura3-52 trp1Δ63 lys2-128 (hht1-hhf1)Δ::LEU2 (hht2-hhf2)Δ::HIS3 pWD25[HHT2-hhf2(K16Q) TRP1 CEN]</i> | This work     | From FY1716           |

To be continued on next page



Supplementary Table 2, continued

| Strain Name      | Genotype                                                                                                                     | Source     | Note        |
|------------------|------------------------------------------------------------------------------------------------------------------------------|------------|-------------|
| <b>Figure 4c</b> |                                                                                                                              |            |             |
| YWD120           | See Figure 4ab                                                                                                               |            |             |
| YWD156           | <i>MATa his3-200 leu2Δ1 ura3-52 trp1Δ63 lys2-128 (hht1-hhf1)Δ::LEU2 (hht2-hhf2)Δ::HIS3 pWD43[hht2(K56R)-HHF2, TRP1, CEN]</i> | This work  | From FY1716 |
| YWD157           | <i>MATa his3-200 leu2Δ1 ura3-52 trp1Δ63 lys2-128 (hht1-hhf1)Δ::LEU2 (hht2-hhf2)Δ::HIS3 pWD45[hht2(K56Q)-HHF2, TRP1, CEN]</i> | This work  | From FY1716 |
| <b>Figure 4d</b> |                                                                                                                              |            |             |
| BY4741           | See Figure 1c                                                                                                                |            |             |
| BY4742           | See Figure 3a                                                                                                                |            |             |
| YKO1490          | BY4741 <i>rtt109Δ::kanMX4</i>                                                                                                | Invitrogen |             |
| YKO11490         | BY4742 <i>rtt109Δ::kanMX4</i>                                                                                                | Invitrogen |             |
| <b>Figure 5a</b> |                                                                                                                              |            |             |
| YWD1000          | <i>MATa his3-200 leu2Δ1 ura3-52 trp1Δ63 lys2-128 (hht1-hhf1)Δ::LEU2</i>                                                      | This work  | From FY1716 |
| YWD1116          | YWD1000 <i>HHT2-hhf2(K16R)</i>                                                                                               | This work  |             |
| YWD1117          | YWD1000 <i>HHT2-hhf2(K16Q)</i>                                                                                               | This work  |             |
| YWD1200          | YWD1000 <i>sir2Δ::kanMX4</i>                                                                                                 | This work  |             |
| YWD1276          | YWD1000 <i>sir2Δ::kanMX4 HHT2-hhf2(K16R)</i>                                                                                 | This work  |             |
| YWD1277          | YWD1000 <i>sir2Δ::kanMX4 HHT2-hhf2(K16Q)</i>                                                                                 | This work  |             |
| <b>Figure 5b</b> |                                                                                                                              |            |             |
| YWD1400          | YWD1000 <i>leu2Δ::SIR2-natMX4</i>                                                                                            | This work  |             |
| YWD1476          | YWD1000 <i>leu2Δ::SIR2-natMX4 HHT2-hhf2(K16R)</i>                                                                            | This work  |             |
| YWD1477          | YWD1000 <i>leu2Δ::SIR2-natMX4 HHT2-hhf2(K16Q)</i>                                                                            | This work  |             |
| <b>Figure 5c</b> |                                                                                                                              |            |             |
| YWD1500          | YWD1000 <i>fob1Δ::natMX4</i>                                                                                                 | This work  |             |
| YWD1576          | YWD1000 <i>fob1Δ::natMX4 HHT2-hhf2(K16R)</i>                                                                                 | This work  |             |
| YWD1577          | YWD1000 <i>fob1Δ::natMX4 HHT2-hhf2(K16Q)</i>                                                                                 | This work  |             |
| <b>Figure 5d</b> |                                                                                                                              |            |             |
| BY4742           | See Figure 3a                                                                                                                | Invitrogen |             |
| LF796            | BY4742 <i>sir3::URA3</i>                                                                                                     | This work  |             |
| LF797            | BY4742 <i>LEU2::SIR2</i>                                                                                                     | This work  |             |
| LF798            | BY4742 <i>sir3::URA3 LEU2::SIR2</i>                                                                                          | This work  |             |
| <b>Figure 5e</b> |                                                                                                                              |            |             |
| BY4741           | See Figure 1c                                                                                                                |            |             |
| YKO7110          | BY4741 <i>sir3Δ::kanMX4</i>                                                                                                  | Invitrogen |             |
| YWD381           | BY4741 <i>sir4Δ::hphMX4</i>                                                                                                  | This work  |             |

**Supplementary Table 3. List of antibodies used in this study.**

| <b>Specificity</b> | <b>Source</b>     | <b>Catalog #</b> | <b>Applications in this work</b> |
|--------------------|-------------------|------------------|----------------------------------|
| H2AS129ph          | Abcam             | Ab15083          | WB                               |
| H3                 | Abcam             | Ab1791           | WB, ChIP                         |
| H3K4me1            | Millipore         | 07-436           | WB                               |
| H3K4me2            | Millipore         | 07-030           | WB                               |
| H3K4me3            | Abcam             | Ab8580           | WB                               |
| H3K9ac             | Abcam             | Ab4441           | WB                               |
| H3S10ph            | Millipore         | 05-817           | WB                               |
| H3K14ac            | Millipore         | 06-911           | WB                               |
| H3K56ac            | Shilatifard       | N/A              | WB                               |
| H3K79me2           | Abcam             | Ab3594           | WB                               |
| H3K79me3           | Abcam             | Ab2621           | WB                               |
| H4                 | Abcam             | Ab31827          | WB, ChIP                         |
| H4                 | Millipore         | 05-858           | WB, ChIP                         |
| H4S1ph             | Berger, G&D, 2006 | N/A              | WB                               |
| H4K12ac            | Abcam             | Ab1761           | WB                               |
| H4K16ac            | Millipore         | 07-329           | WB, ChIP                         |
| H4K16ac            | Active Motif      | 39167            | WB, ChIP                         |
| Htz1               | Abcam             | Ab4626           | WB                               |
| Sir2               | Santa Cruz        | sc-25753         | WB, ChIP                         |

N/A: Not applicable

**Supplementary Table 4. List of real-time PCR oligos used in this study.**

| <b>Location</b> | <b>Oligo Name</b>  | <b>Oligo Sequence</b>          |
|-----------------|--------------------|--------------------------------|
| <i>ACT1</i>     | ACT1-RT-F          | TCGTTCCAATTTACGCTGGTT          |
|                 | ACT1-RT-R          | CGGCCAAATCGATTCTCAA            |
| <i>HML</i>      | HML-Alpha1-RT-F    | TCAATATTATTCGACCACTCAAGAAAG    |
|                 | HML-Alpha1-RT-R    | CGCTATCCTGTGAATTTGGATT         |
| <i>RDN1</i>     | NTS2-1-RT-F        | CGGATGCGGGCGATAAT              |
|                 | NTS2-1-RT-R        | GCCGACATTCTGTCCCACAT           |
|                 | RDN58-1-RT-F       | GCGAAATGCGATACGTAATGTG         |
|                 | RDN58-1-RT-R       | GGCGCAATGTGCGTTCA              |
| <i>SAS2</i>     | SAS2-qPCR-F        | GGAGCGCCGTTTATTTTCGA           |
|                 | SAS2-qPCR-R        | TGAAGCAGTATTCACAAACGAAAAG      |
| <i>SIR2</i>     | SIR2-qPCR-F        | GTGCAGTGCCATGGCTCTT            |
|                 | SIR2-qPCR-R        | TCTCACCGGGTAGGTTCCAA           |
| <i>TEL5R</i>    | TEL5R-YP-RT-F      | CGTTTGTGGAAGACGAACCAGAT        |
|                 | TEL5R-YP-RT-R      | TGTAGACCATCACGTGGTTTGT         |
|                 | TEL5R-XR-RT-F      | TGGAGTTGGATATGGGTAATTGG        |
|                 | TEL5R-XR-RT-R      | CATCCATCCCTCTACTTCCCTACCA      |
|                 | TEL5R-XC-RT-F      | CCATGGAGTGGAATGTGAGAGTAG       |
|                 | TEL5R-XC-RT-R      | TGCCATACTCACCCCTCACTTGT        |
| <i>TEL6L</i>    | TEL6L-XC-RT-F      | TGAGTACAAATGCACCCACATCA        |
|                 | TEL6L-XC-RT-R      | GCGTAAATGGCACAGGGTATAGA        |
|                 | TEL6L-XR-RT-F      | CCCTTCCATCCTGTCTCTCAACT        |
|                 | TEL6L-XR-RT-R      | GTGAGGTTGGATATGGGTAATTGG       |
| <i>TEL6R</i>    | TEL6R-RT-F         | TGAGGCCATTTCCGTGTGTA           |
|                 | TEL6R-RT-R         | CCCAGTCCTCATTTCCATCAA          |
|                 | TEL6R-0.2kb-RT-F   | CCTTTTTTGGATATAACTGTCCGAGAGT   |
|                 | TEL6R-0.2kb-RT-R   | TCCGAACGCTATTCCAGAAAGT         |
|                 | TEL6R-3.6kb-RT-F   | TCTCGGTGAACGGATGCA             |
|                 | TEL6R-3.6kb-RT-R   | CACGACAAAACCACCGATGA           |
|                 | TEL6R-20kb-RT-F    | CGCCTGCGTTCGCAAT               |
| TEL6R-20kb-RT-R | GCAGGCCCGCAGACTCTA |                                |
| <i>TEL7L</i>    | TEL7L-XR-RT-F      | AACCACCATCCATCTCTCTACTTACTACTA |
|                 | TEL7L-XR-RT-R      | AGAACAACAGTACAGTGAGTAGGACATG   |
|                 | TEL7L-XC-RT-F      | TCAGTACTAAATGCACCCACATCA       |
|                 | TEL7L-XC-RT-R      | TGGGTAAATGGCACAGGGTATAG        |
| <i>TEL9L</i>    | TEL9L-XC-RT-F      | CACATCATTATGCACGGCACTT         |
|                 | TEL9L-XC-RT-R      | TGGATAATCGTGGGCTTTATGG         |
|                 | TEL9L-XR-RT-F      | CCTTGATTTGCAATGTCCCACTA        |
|                 | TEL9L-XR-RT-R      | TCCTGTTTGACGCAGATTTTAGC        |

To be continued on next page

**Supplementary Table 4, continued**

| <b>Location</b> | <b>Oligo Name</b> | <b>Oligo Sequence</b>       |
|-----------------|-------------------|-----------------------------|
| <i>TEL9R</i>    | TEL9R-XC-RT-F     | TGGGTAAATGGCACAGGGTATAG     |
|                 | TEL9R-XC-RT-R     | AAATCAGTACAAATGCACTCACATCA  |
|                 | TEL9R-XR-RT-F     | TGGTGGTAGTACGTAGAGAGATGGAT  |
|                 | TEL9R-XR-RT-R     | CCACTTGTTACCCTGTTCCATTC     |
| <i>TEL10R</i>   | TEL10R-XC-RT-F    | TGGGTAAATGGCACAGGGTATAG     |
|                 | TEL10R-XC-RT-R    | TGCACTCGCATCATTATGCA        |
|                 | TEL10R-XR-RT-F    | TGGAGTTGGATATGGGTAATTGG     |
|                 | TEL10R-XR-RT-R    | CAACCACCATCCATCTCTCTACTTACT |
| <i>TEL11L</i>   | TEL11L-XC-RT-F    | CACTAAATCAGTACGATGCACTCACA  |
|                 | TEL11L-XC-RT-R    | TGGGTAAATTGCACAGGGTATAAA    |
|                 | TEL11L-XR-RT-F    | GTCTCCAAACCTACCCTCACATTAC   |
|                 | TEL11L-XR-RT-R    | TGGTGACAGTAGAGAGATGGATGGT   |
| <i>TEL15R</i>   | TEL15R-XC-RT-F    | GCTGAGGCAAGTGCCGTTAA        |
|                 | TEL15R-XC-RT-R    | GGCCCATCTCTCACTTCATCA       |
|                 | TEL15R-XR-RT-F    | CAACATGGTGGGTAGAACAACAG     |
|                 | TEL15R-XR-RT-R    | CATATCCAACCTCCACCACCACTT    |

**Supplementary Table 5. List of Mean Lifespan (MLS) and p-values for replicative lifespan analysis in this study.**

| <b>Figure</b> | <b>Strain A</b>                                           | <b>Strain B</b>                                | <b>p-value</b>         |
|---------------|-----------------------------------------------------------|------------------------------------------------|------------------------|
| Fig. 3a       | <i>sas2Δ</i> (32.4, n=105)                                | WT (26.7, n=125)                               | $6.5 \times 10^{-4}$   |
| Fig. 3b       | <i>SIR2</i> -OE (31.4, n=39)                              | WT (24.2, n=20)                                | 0.03                   |
| Fig. 4a       | <i>sas2Δ SIR2</i> -OE (29.0, n=40)                        | <i>sas2Δ</i> (28.4, n=20)                      | 0.88                   |
| Fig. 4a       | H4K16R (15.6, n=50)                                       | H4WT (17.8, n=50)                              | 0.234                  |
| Fig. 4a       | H4K16Q (11.7, n=50)                                       | H4WT (17.8, n=50)                              | 0.002                  |
| Fig. 4c       | H3K56R (9.2, n=50)                                        | H3WT (17.8, n=50)                              | $9.0 \times 10^{-6}$   |
| Fig. 4c       | H3K56Q (8.7, n=50)                                        | H3WT (17.8, n=50)                              | $2.4 \times 10^{-6}$   |
| Fig. 4d       | <i>rtt109Δ</i> (10.1, <i>MATα</i> n=45, <i>MATa</i> n=40) | WT (30.1, <i>MATα</i> n=25, <i>MATa</i> n=40)  | $1.33 \times 10^{-21}$ |
| Fig. 5a       | WT+H4K16R (30.4, n=120)                                   | WT+H4WT (37.0, n=120)                          | $2.0 \times 10^{-6}$   |
| Fig. 5a       | WT+H4K16Q (24.6, n=120)                                   | WT+H4WT (37.0, n=120)                          | $1.7 \times 10^{-19}$  |
| Fig. 5a       | <i>sir2Δ</i> +H4K16R (14.6, n=120)                        | <i>sir2Δ</i> +H4WT (15.0, n=120)               | 0.93                   |
| Fig. 5a       | <i>sir2Δ</i> +H4K16Q (13.6, n=110)                        | <i>sir2Δ</i> +H4WT (15.0, n=120)               | 0.053                  |
| Fig. 5a       | <i>sir2Δ</i> +H4WT (15.0, n=120)                          | WT+H4WT (37.0, n=120)                          | $1.0 \times 10^{-35}$  |
| Fig. 5b       | <i>SIR2</i> -OE+H4K16R (32.7, n=120)                      | <i>SIR2</i> -OE+H4WT (38.5, n=130)             | $1.4 \times 10^{-5}$   |
| Fig. 5b       | <i>SIR2</i> -OE+H4K16Q (25.0, n=120)                      | <i>SIR2</i> -OE+H4WT (38.5, n=130)             | $8.0 \times 10^{-17}$  |
| Fig. 5c       | <i>fob1Δ</i> +H4K16R (31.1, n=120)                        | <i>fob1Δ</i> +H4WT (37.0, n=120)               | $4.7 \times 10^{-4}$   |
| Fig. 5c       | <i>fob1Δ</i> +H4K16Q (28.0, n=120)                        | <i>fob1Δ</i> +H4WT (37.0, n=120)               | $1.7 \times 10^{-8}$   |
| Fig. 5d       | <i>SIR2</i> -OE (31.2, n=160)                             | WT (24.1, n=200)                               | $6.4 \times 10^{-8}$   |
| Fig. 5d       | <i>SIR2</i> -OE <i>sir3Δ</i> (24.1, n=200)                | WT (24.1, n=200)                               | 1.0                    |
| Fig. 5d       | <i>SIR2</i> -OE (31.2, n=160)                             | <i>SIR2</i> -OE <i>sir3Δ</i> (24.1, n=200)     | $7.3 \times 10^{-8}$   |
| Fig. 5d       | <i>sir3Δ</i> (21.8, n=160)                                | <i>SIR2</i> -OE <i>sir3Δ</i> (24.1, n=200)     | $8.5 \times 10^{-3}$   |
| Fig. 5e       | <i>sir3Δ</i> (19.2, n=40)                                 | WT (29.1, n=40)                                | $2.4 \times 10^{-5}$   |
| Fig. 5e       | <i>sir4Δ</i> (21.0, n=40)                                 | WT (29.1, n=40)                                | $1.3 \times 10^{-4}$   |
| Supp. Fig. 8  | H3K9R (14.9, n=50)                                        | H3WT (17.8, n=50)                              | 0.11                   |
| Supp. Fig. 8  | H3K9Q (21.3, n=50)                                        | H3WT (17.8, n=50)                              | 0.34                   |
| Supp. Fig. 9  | <i>hst3Δ</i> ( <i>MATα</i> n=120, <i>MATa</i> n=40)       | WT (28.3, <i>MATα</i> n=140, <i>MATa</i> n=40) | $1.8 \times 10^{-26}$  |
| Supp. Fig. 9  | <i>hst4Δ</i> ( <i>MATα</i> n=120, <i>MATa</i> n=40)       | WT (28.3, <i>MATα</i> n=140, <i>MATa</i> n=40) | $1.2 \times 10^{-5}$   |
| Supp. Fig. 9  | <i>hst3Δ hst4Δ</i> ( <i>MATα</i> n=119)                   | WT (28.3, <i>MATα</i> n=140, <i>MATa</i> n=40) | $1.0 \times 10^{-52}$  |
| Supp. Fig. 12 | <i>sgs1Δ</i> +H4K16R (7.5, n=24)                          | <i>sgs1Δ</i> +H4WT (10.2, n=24)                | $7.6 \times 10^{-3}$   |
| Supp. Fig. 12 | <i>sgs1Δ</i> +H4K16Q (5.9, n=24)                          | <i>sgs1Δ</i> +H4WT (10.2, n=24)                | $1.7 \times 10^{-3}$   |

MLS and the number of cells analyzed (n) are listed in parenthesis.
